# Supplementary material for: Inhibitory Effect of Naphthoquinone-Tryptophan Hybrid towards Aggregation of PAP f39 Semen Amyloid
Source: PubMed Central journal article supplement (PMC6320874; doi:10.3390/molecules23123279), 2018-12-11
Supplement: molecules-23-03279-s001.pdf [file molecules-23-03279-s001.pdf]

## Supplementary data

### **Inhibitory effect of Naphthoquinone-Tryptophan hybrid towards aggregation of PAP f39 semen amyloid**

V. Guru KrishnaKumar<sup>1†</sup>, Satabdee Mohapatra<sup>1†</sup>, Ashim Paul<sup>1</sup>, Elad Arad<sup>2</sup>, Raz Jelinek<sup>2</sup>, Ehud Gazit<sup>1</sup> and Daniel Segal<sup>1,3\*</sup>

<sup>1</sup>School of Molecular Microbiology & Biotechnology, Tel Aviv University, Tel Aviv 69978, Israel

<sup>2</sup>Department of Chemistry and Ilse Katz Institute (IKI) for Nanoscale Science and Technology, Ben Gurion University of the Negev, Beer Sheva 84105, Israel

<sup>3</sup>Sagol Interdisciplinary School of Neurosciences, Tel Aviv University, Tel Aviv 69978, Israel

† Contributed equally to the work

\* Corresponding author; E-mail address: [dsegal@post.tau.ac.il](mailto:dsegal@post.tau.ac.il) (Prof. Daniel Segal)

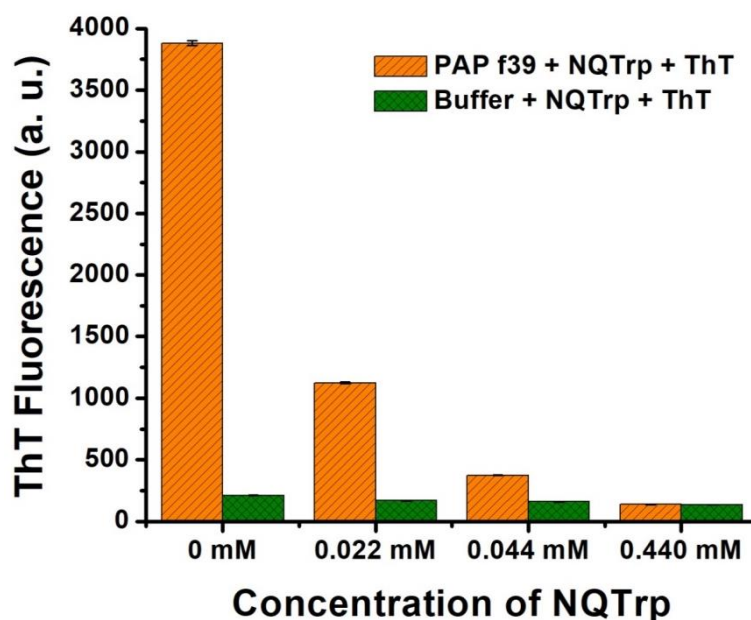

**Figure S1.** NQTrp shows minimal quenching of ThT fluorescence. ThT (50  $\mu$ M) was incubated with various concentrations of NQTrp. ThT fluorescence emission was measured at 480 nm by exciting the dye at 440 nm.

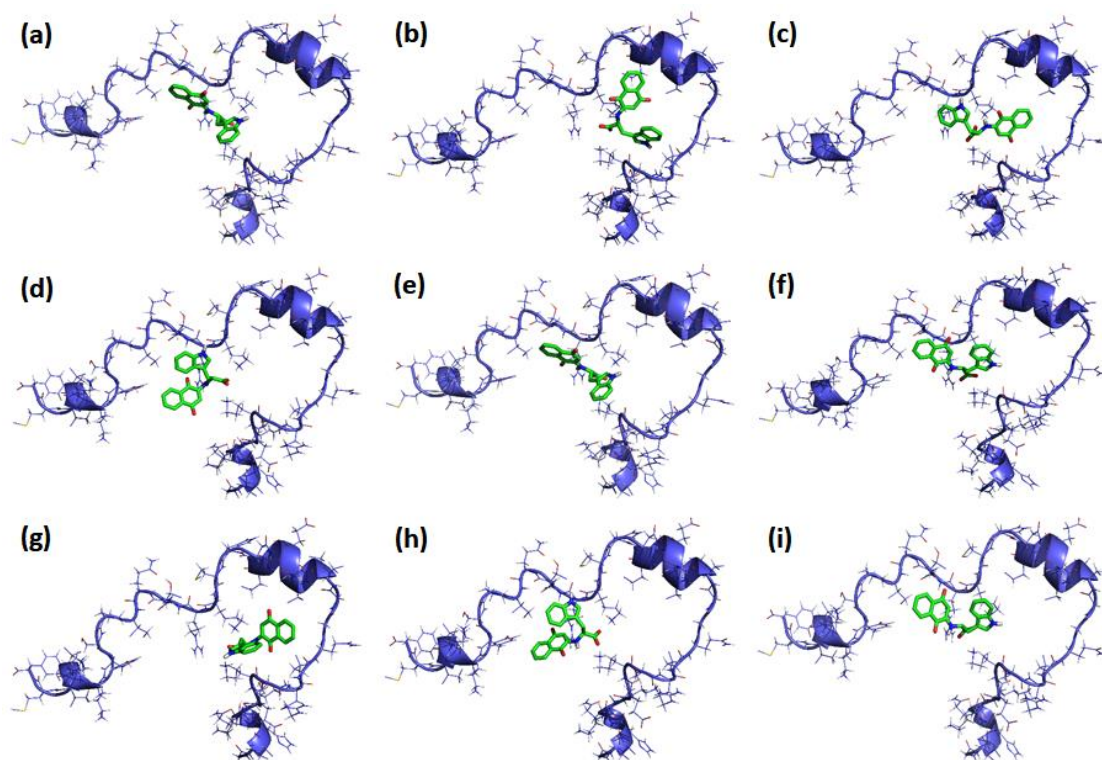

**Figure S2.** Various docking conformations of PAP f39 monomer and NQTrp.

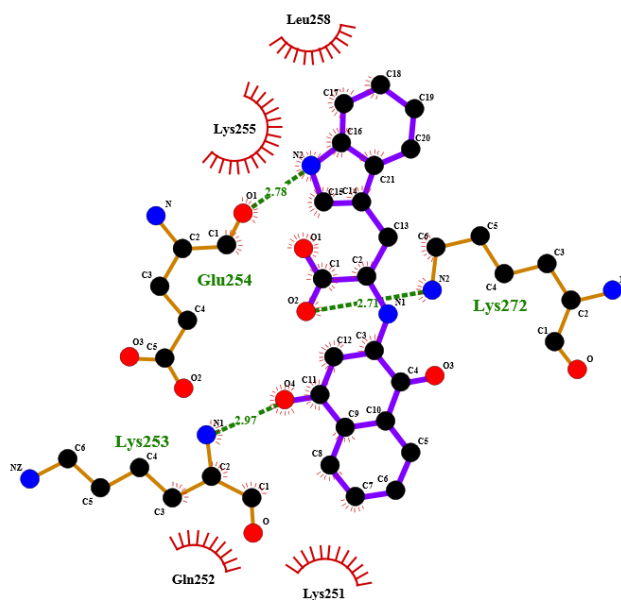

**Figure S3.** Docking study: Association of NQTrp with PAP f39.

**Table S1.** Post-docking analysis shows the interaction profile of NQTrp with PAP f39 monomer corresponding to the docked conformers in SI Fig. 2.

| Notation | NQTrp association with PAP <sub>248-286</sub> |                                                                                                                             | Binding Energy<br>(kcal/mol) |
|----------|-----------------------------------------------|-----------------------------------------------------------------------------------------------------------------------------|------------------------------|
|          | Hydrogen bonds                                | Hydrophobic Interactions                                                                                                    |                              |
| a        | Lys <sub>272</sub>                            | Lys <sub>255</sub> , Arg <sub>273</sub> , Ala <sub>274</sub> , Thr <sub>275</sub> , Ile <sub>277</sub>                      | -6.99                        |
| b        | Lys <sub>272</sub>                            | Lys <sub>255</sub> , Leu <sub>258</sub> , Val <sub>264</sub> , Asn <sub>265</sub> , Leu <sub>268</sub> , Asn <sub>269</sub> | -6.98                        |
| c        | Lys <sub>255</sub> , Lys <sub>272</sub>       | Arg <sub>273</sub> , Thr <sub>275</sub> , Leu <sub>258</sub> , Val <sub>264</sub> ,                                         | -6.94                        |
| d        | Lys <sub>272</sub> , Arg <sub>273</sub>       | Lys <sub>255</sub> , Ala <sub>274</sub> , Thr <sub>275</sub> , Ile <sub>277</sub> , Tyr <sub>280</sub>                      | -6.78                        |
| e        | Lys <sub>272</sub>                            | Lys <sub>255</sub> , Arg <sub>273</sub> , Ala <sub>274</sub> , Thr <sub>275</sub> , Ile <sub>277</sub> ,                    | -6.77                        |
| f        | Lys <sub>272</sub>                            | Lys <sub>255</sub> , Arg <sub>273</sub> , Thr <sub>275</sub> , Ile <sub>277</sub> ,                                         | -6.69                        |
| g        | -                                             | Lys <sub>255</sub> , Leu <sub>258</sub> , Gln <sub>259</sub> , Val <sub>264</sub> , Leu <sub>268</sub> , Lys <sub>268</sub> | -6.64                        |
| h        | Lys <sub>255</sub> , Lys <sub>272</sub>       | Arg <sub>273</sub> , Thr <sub>275</sub> , Ile <sub>277</sub> , Tyr <sub>280</sub>                                           | -6.49                        |
| i        | Lys <sub>272</sub>                            | Lys <sub>255</sub> , Arg <sub>273</sub> , Ala <sub>274</sub> , Thr <sub>275</sub> , Ile <sub>277</sub> ,                    | -6.40                        |
